# Supplementary material
Source: publisher figshare collection journal article supplement (https://tandf.figshare.com/ndownloader/files/14811965)
Supplement: Supplementary file 1 [file 14811965]

**Supplementary Information**

Precise tuning of disulfide crosslinking in mRNA polyplex micelles for optimizing extracellular and intracellular nuclease tolerability

Anjaneyulu Dirisala, Satoshi Uchida, Theofilus A. Tockary, Naoto Yoshinaga, Junjie Li, Shigehito Osawa, Lahari Gorantla, Shigeto Fukushima, Kensuke Osada, and Kazunori Kataoka

**Supplementary Figure S1** Preparation of mRNA polyplex micelle with disulfide crosslinking. See Scheme 1 for detail about polycation structure. See “*Preparation of polyplex micelle (PM)*” section in *Materials and Methods* for detailed methods of PM preparation.

**Supplementary Figure S2** Gel permeation chromatogram of PEG–PLys(TFA).

**Supplementary Figure S3** 1H NMR spectrum of PEG–PLys(TFA) (solvent, DMSO-d6; temperature, 25 °C; concentration, 10 mg/mL).

**Supplementary Figure S4** Gel permeation chromatogram of PEG–PLys.

**Supplementary Figure S5** 1H NMR spectrum of PEG–PLys (solvent, D2O; temperature, 25 °C; concentration, 10 mg/mL).

**Supplementary Figure S6** 1H NMR spectra of a series of PEG–PLys(PDP) (solvent, D2O; temperature, 25 °C; concentration, 10 mg/mL). PDP conjugation ratio in the total –NH2 groups of the original PEG–PLys is 13% in (A), 21% in (B) and 46% in (C).

**Supplementary Figure S7** 1H NMR spectra of a series of PEG–PLys(MP-X) (solvent, D2O; temperature, 25 °C; concentration, 10 mg/mL). (A) PEG–PLys(MP-13), (B) PEG–PLys(MP-21) and (C) PEG–PLys(MP-46).

**Supplementary Figure S8** 1H NMR spectrum of PEG–PLys(AMP-X) (solvent, D2O; temperature, 25 °C; concentration, 10 mg/mL). (A) PEG–PLys(AMP-13), (B) PEG–PLys(AMP-26) and (C) PEG–PLys(AMP-47).

**Supplementary Figure S9** Cytotoxicity of PMs. Naked mRNA, non-crosslinked PM (Non-CPM), PEG–PLys(MP-X) PMs (MP-X), and PEG–PLys(AMP-X) PMs (AMP-X) with various crosslinking degrees were transfected to HuH-7 cells, followed by cytotoxicity analysis 72 h after mRNA transfection. The cell toxicity was expressed in terms of the percentage of cell viability normalized against the control cells treated with 10 mM HEPES buffer (pH 7.3). X stands for the percentage of MP or AMP groups compared to the total –NH2 groups in the original PEG–PLys block copolymers. Data were presented as the mean ± standard error of the mean (s.e.m.) (*n* = 6). Statistical significance was analysed using 2-tailed Student's t-test.
